# Supplementary material for: Maximum Somatic Allele Frequency-Adjusted Blood-Based Tumor Mutational Burden Predicts the Efficacy of Immune Checkpoint Inhibitors in Advanced Non-Small Cell Lung Cancer
Source: MDPI journal article supplement (doi:10.3390/cancers14225649), 2022-11-17
Supplement: s1 [file s1]

### **Supplementary Files**

**Figure S1:**The forest plots for HRs and P- values of OS and PFS comparing bTMB-H and bTMB-L subgroups with corresponding cutoff points in Zhuo cohort and Wang cohort.

**Figure S2:**The correlation between MSAF and OS/PFS in Wang & Zhuo cohort.

**Figure S3:**The distribution of subclones between high MSAF and low MSAF changed with MSAF cutoff points in GCGD cohort.

**Figure S4:**The forest plots for HRs and P values of PFS between atezolizumab and docetaxel comparing Ma-bTMB-H and Ma-bTMB-L subgroups with corresponding cutoff points in POPLAR cohort.

**Figure S5:**The forest plots for HRs and P- values of OS comparing LAF-bTMB-H and LAF-bTMB-L changed with corresponding cutoff points in Wang & Zhuo cohort.

Figure S1

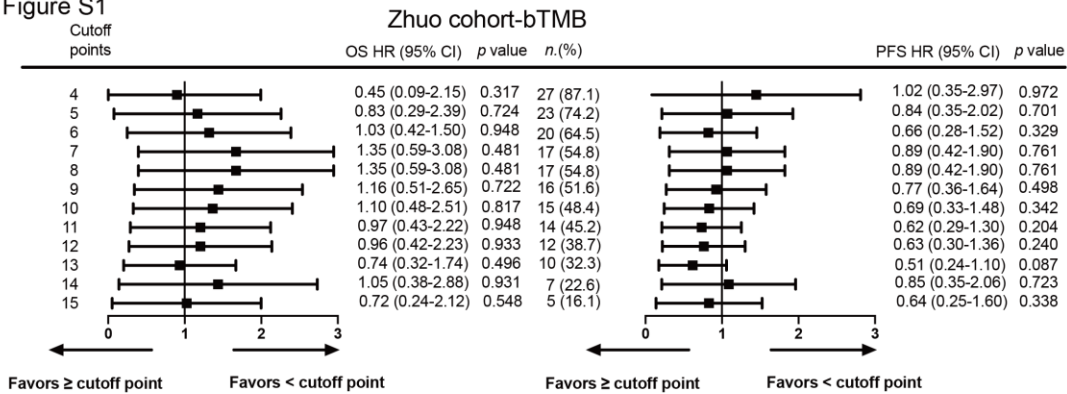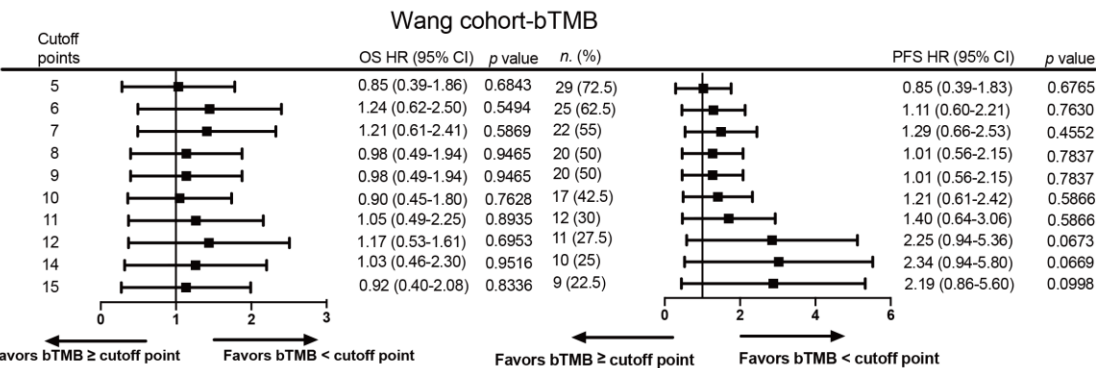

Figure S2

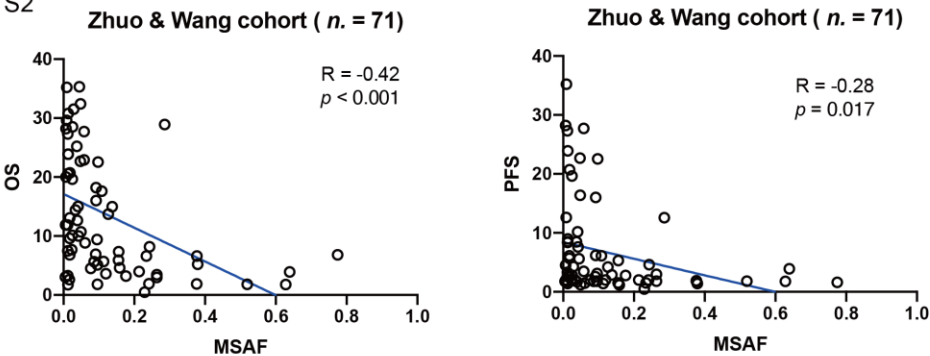

Figure S3

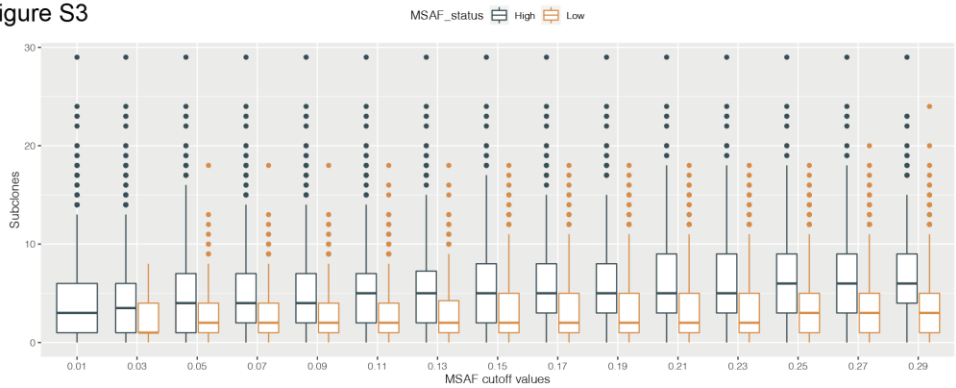

Figure S4

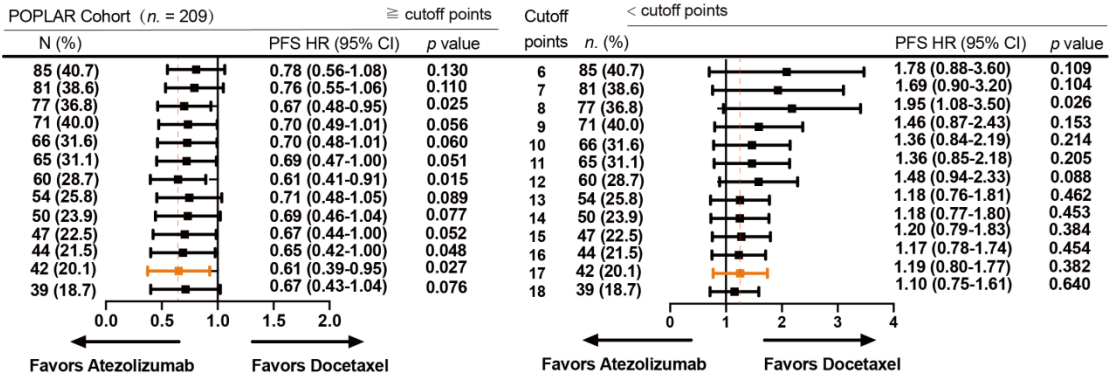

Figure S5

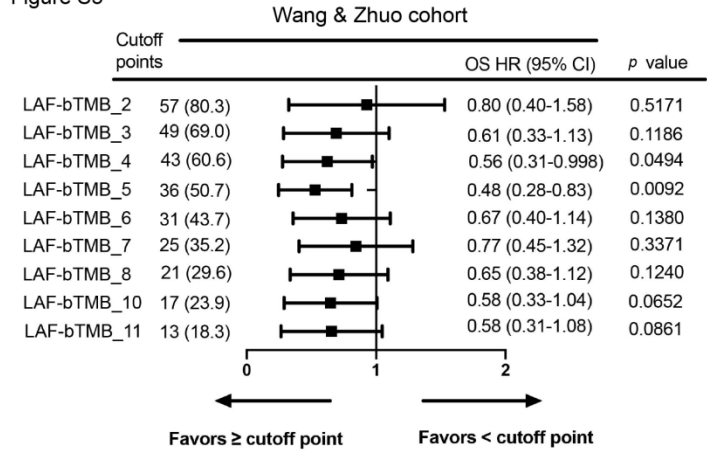

**Table S1:** Basic characteristic of patients in Wang cohort.

| Characteristics               | Total (n = 40) |
|-------------------------------|----------------|
| Age (years), median (range)   | 58 (39-69)     |
| Gender (% female)             | 10 (25)        |
| ECOG PS (%)                   |                |
| 0-1                           | 35 (87.5)      |
| ≥ 2                           | 4 (10)         |
| Unknown                       | 1 (2.5)        |
| Smoking status (%)            |                |
| Never                         | 13 (32.5)      |
| Former/current                | 26 (65)        |
| Unknown                       | 1 (2.5)        |
| Histology (%)                 |                |
| Non-squamous                  | 28 (67.5)      |
| Squamous                      | 12 (32.5)      |
| Stage (%)                     |                |
| III                           | 7 (17.5)       |
| IV                            | 33 (82.5)      |
| bTMB (mut/Mb), median (range) | 7 (1-38)       |

ECOG, Eastern Cooperative Oncology Group; PS, performance status; bTMB, blood tumor mutational burden.

**Table S2:** Basic characteristic of patients in Zhuo cohort.

| Characteristics               | Total (n = 31)    |
|-------------------------------|-------------------|
| Age (years), median (range)   | 62 (47-77)        |
| Gender (% female)             | 6 (19.3)          |
| ECOG PS (%)                   |                   |
| 0-1                           | 30 (96.8)         |
| ≥ 2                           | 1 (3.2)           |
| Smoking status (%)            |                   |
| Never                         | 9 (29.1)          |
| Former/current                | 22 (70.9)         |
| Histology (%)                 |                   |
| Non-squamous                  | 24 (77.5)         |
| Squamous                      | 7 (22.5)          |
| Stage (%)                     |                   |
| III                           | 5 (16.1)          |
| IV                            | 26 (83.9)         |
| bTMB (mut/Mb), median (range) | 8.64 (0.96-48.08) |

ECOG, Eastern Cooperative Oncology Group; PS, performance status; bTMB, blood tumor mutational burden.
